# Supplementary material for: Efficient Transmission and Characterization of Creutzfeldt–Jakob Disease Strains in Bank Voles
Source: PubMed Central journal article supplement (PMC1383487; doi:10.1371/journal.ppat.0020012), 2006-02-24

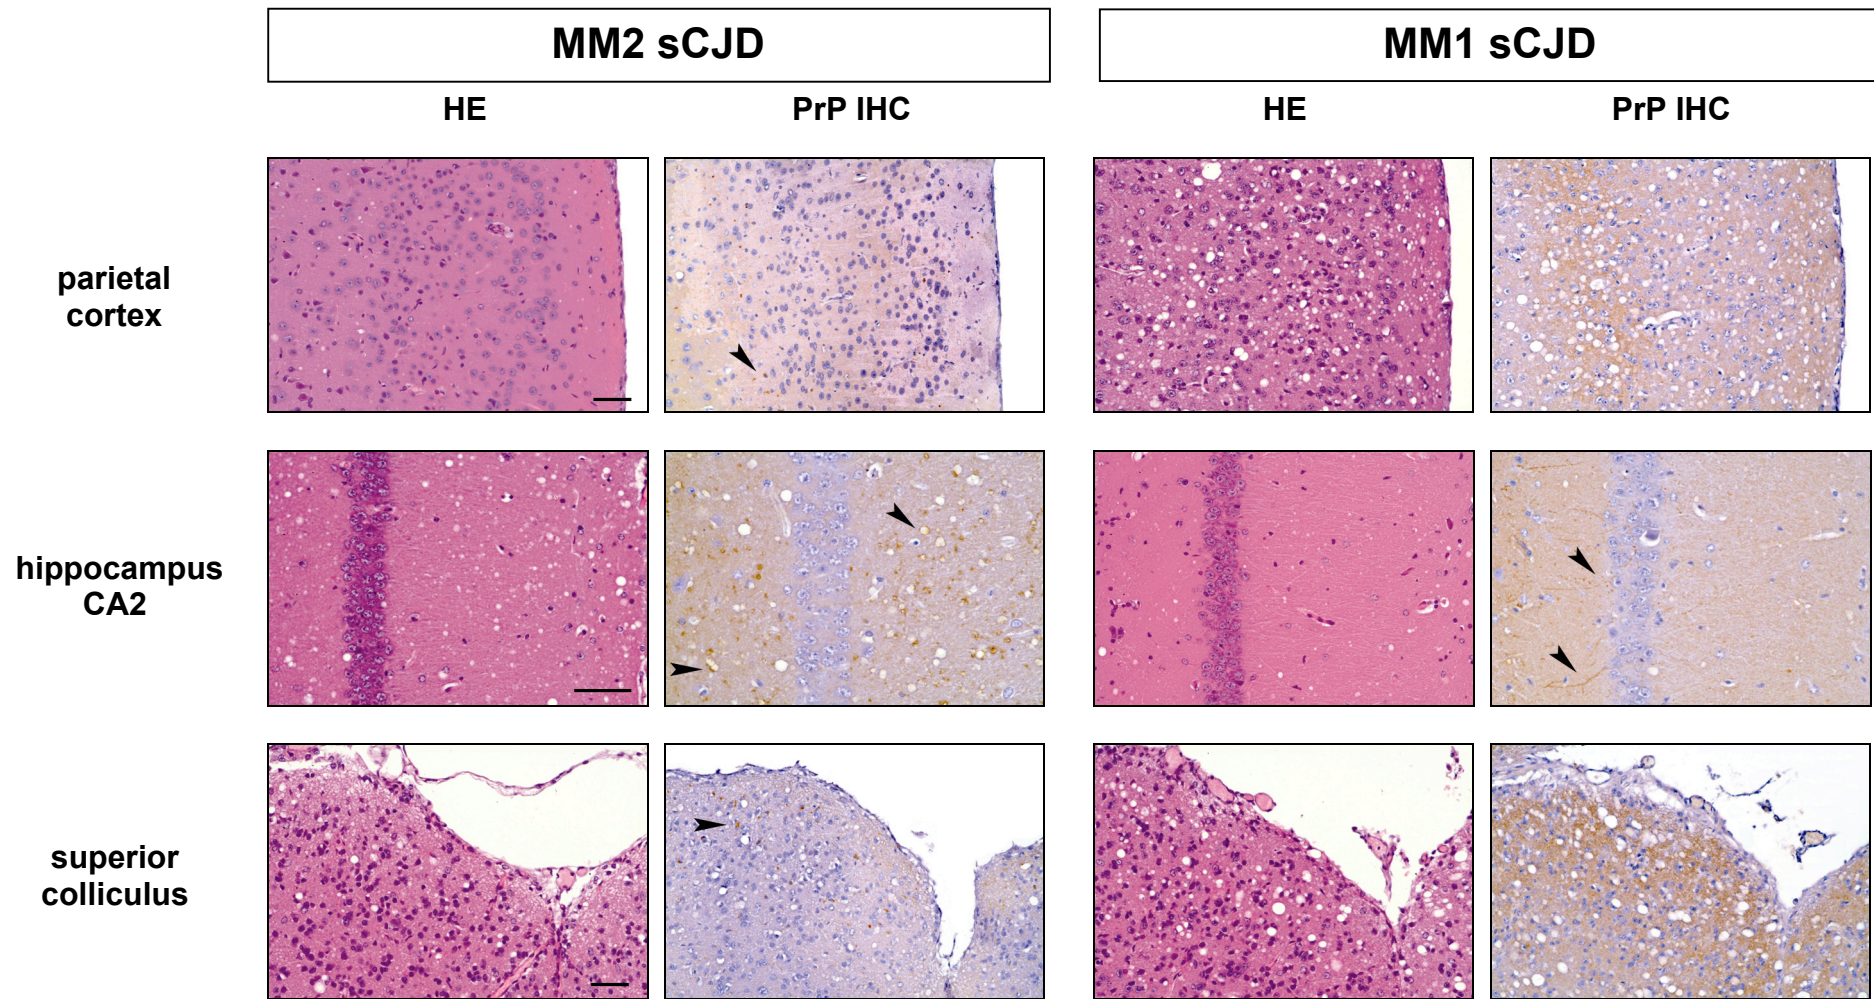

Supplement: ppat.0020012.sg001.pdf [file ppat.0020012.sg001.pdf]
